# Supplementary material for: Rapid pre-filtering of amphetamine and derivatives by direct analysis in real time (DART)-differential mobility spectrometry (DMS)
Source: Royal Society of Chemistry journal article supplement (doi:10.1039/c7ay00892a), 2017-01-01
Supplement: c7ay00892a1.pdf [file c7ay00892a1.pdf]

## Electronic supplementary information

### Rapid Pre-filtering of Amphetamine and Derivatives by Direct Analysis in Real Time (DART)-Differential Mobility Spectrometry (DMS)

Authors: Ifeoluwa Ayodeji, Timothy Vazquez, Ronelle Bailey, and Theresa Evans-Nguyen\*  
University of South Florida, Department of Chemistry  
4202 East Fowler Avenue- CHE 205, Tampa FL 33620.

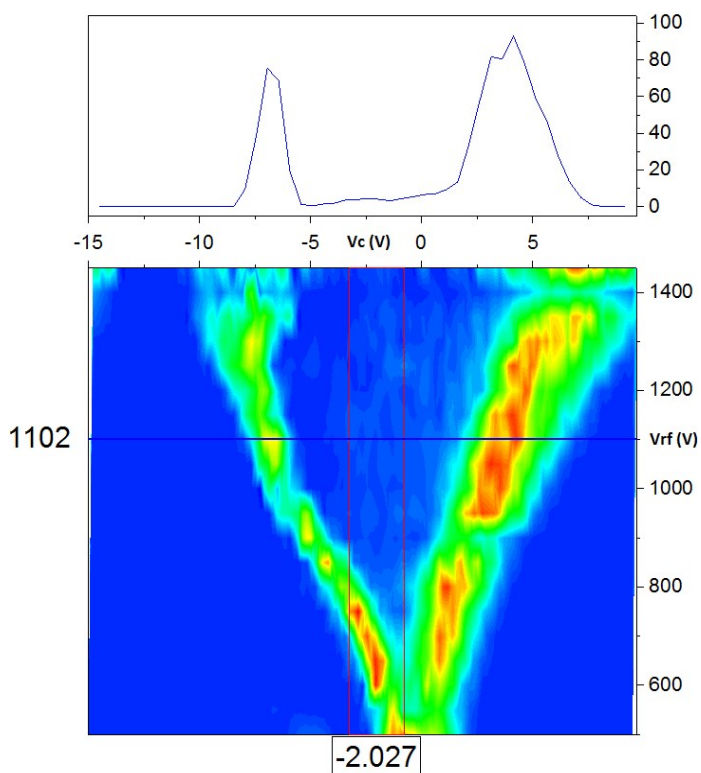

**Figure S-1:** Dispersion plot of neat caffeine (bottom). The chronogram obtained at  $V_{rf}$  1100 V (top) filtered out caffeine at  $V_c$  -7 V

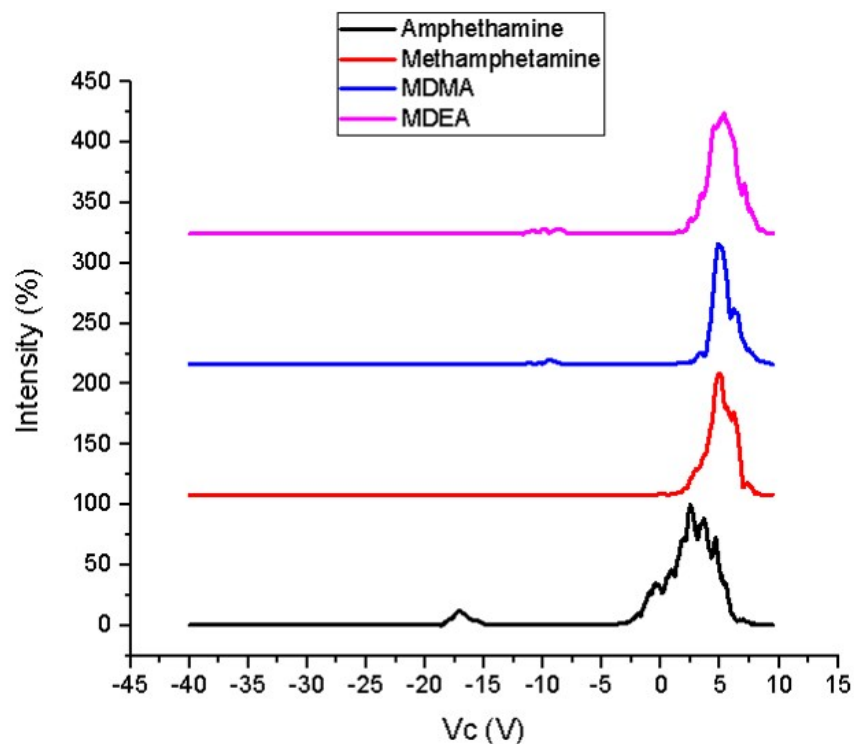

**Figure S-2.** Extracted V<sub>c</sub> chronograms of neat drug samples at 1500 V<sub>rf</sub>.

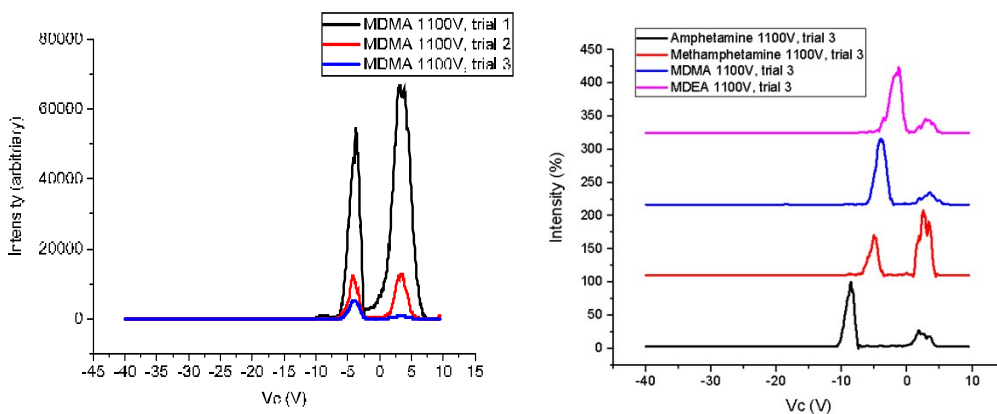

**Figure S-3:** a) Chronogram at 1100 V<sub>rf</sub> of three successive trials showing absolute signal intensities for MDMA sample consumption across a single mesh. b) The third trial of the four-component drug mixture separated at 1100 V<sub>rf</sub> after modification to sample preparation and inlet hardware. The samples are normalized to the most intense peak.

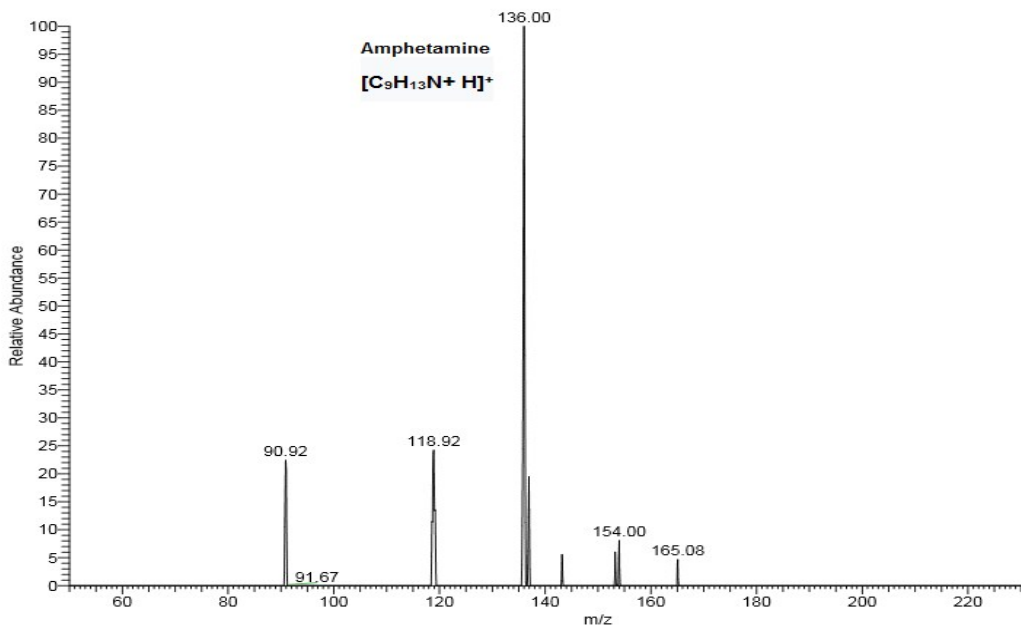

**Figure S-4.** Mass spectrum of Amphetamine in drug mixture obtained at  $V_c$  -9.0 V

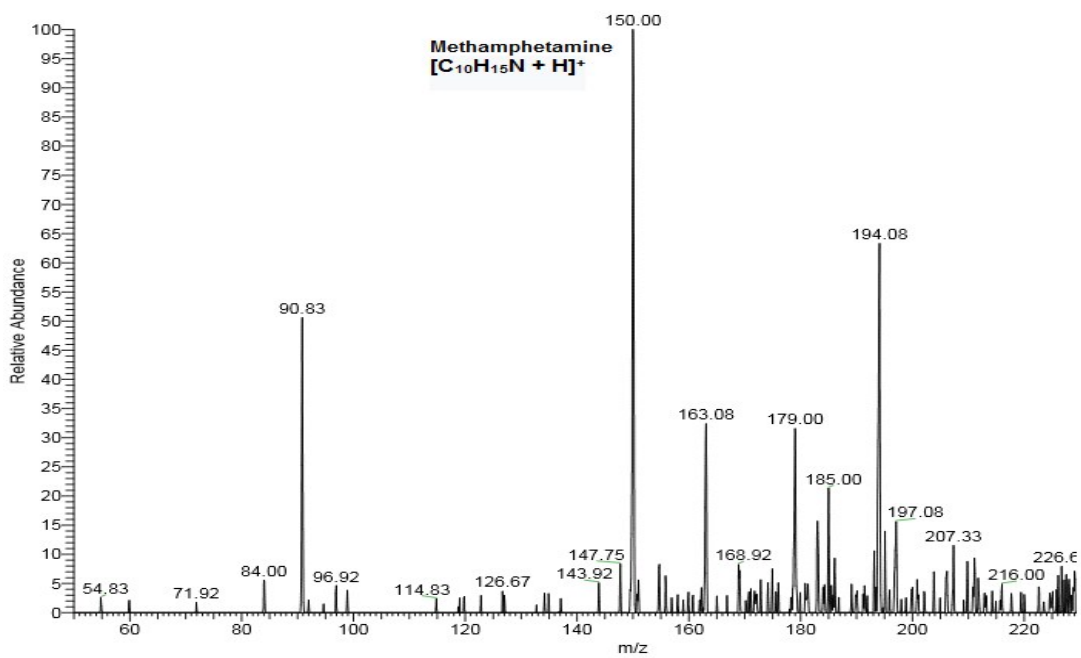

**Figure S-5.** Mass spectrum of Methamphetamine in drug mixture obtained at  $V_c$  -5.0 V

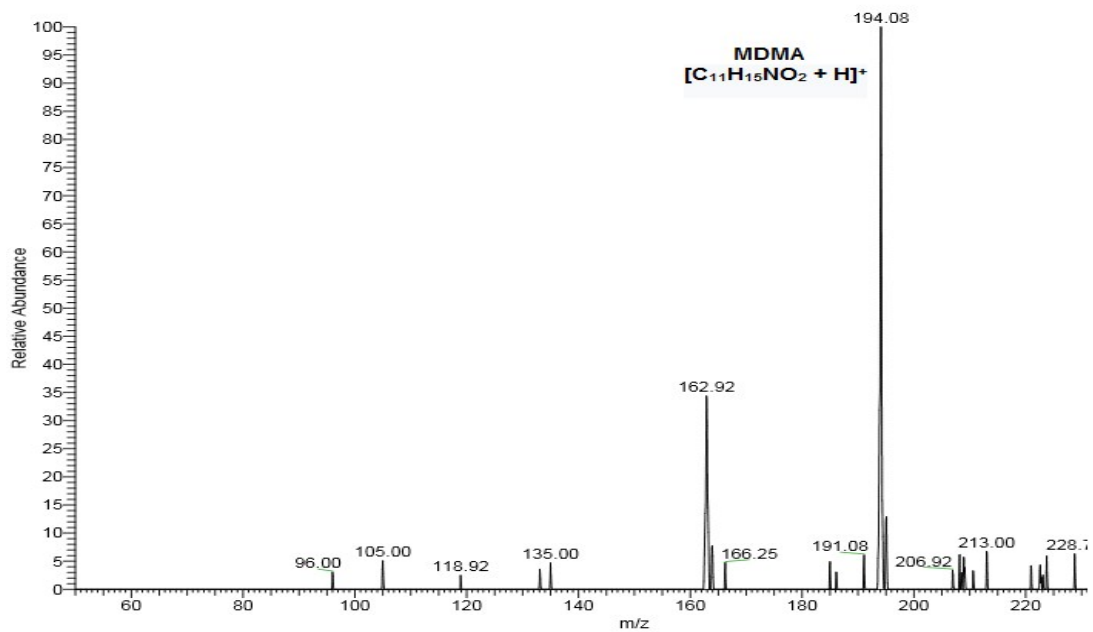

**Figure S-6.** Mass spectra of MDMA in drug mixture obtained at  $V_c -4.0$  V

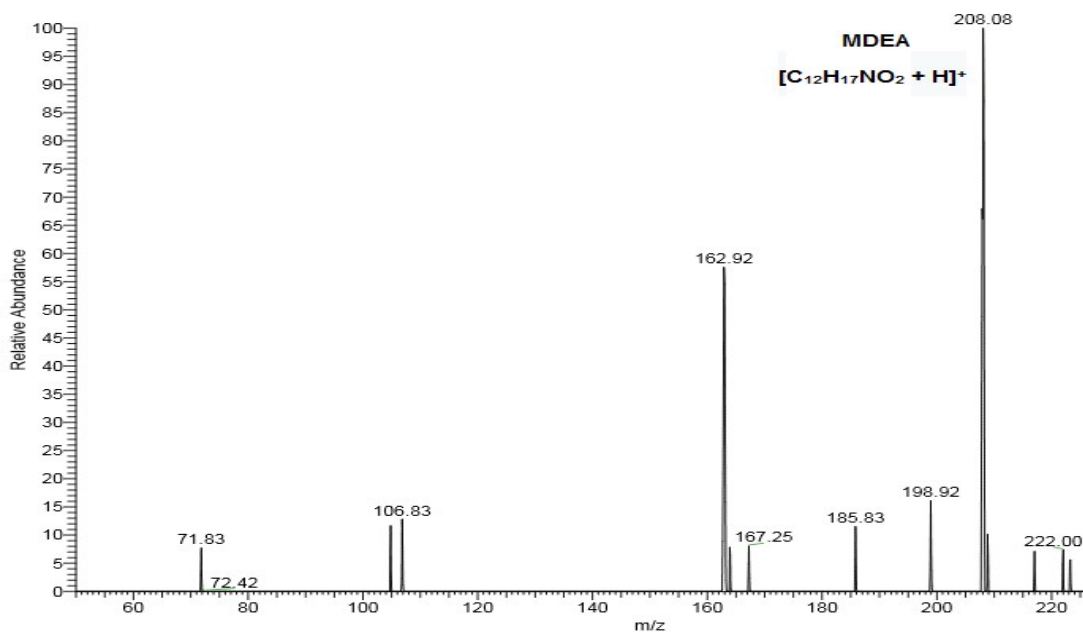

**Figure S-7.** Mass spectra of MDEA in drug mixture obtained at  $V_c -2.5$  V

**Table S-1.** DIP/RIP ratio comparison of four-component drug mixture separated at 1100 V<sub>rf</sub> at first trial sample mesh in Figure 6.

|                        | <b>DIP Intensity</b> | <b>RIP Intensity</b> | <b>DIP/RIP ratio</b> |
|------------------------|----------------------|----------------------|----------------------|
| <b>Amphetamine</b>     | 3.27E+04             | 1.39E+05             | 0.2343               |
| <b>Methamphetamine</b> | 1.34E+04             | 2.28E+04             | 0.5872               |
| <b>MDMA</b>            | 2.03E+05             | 4.13E+05             | 0.4921               |
| <b>MDEA</b>            | 1.52E+05             | 2.39E+05             | 0.6370               |
